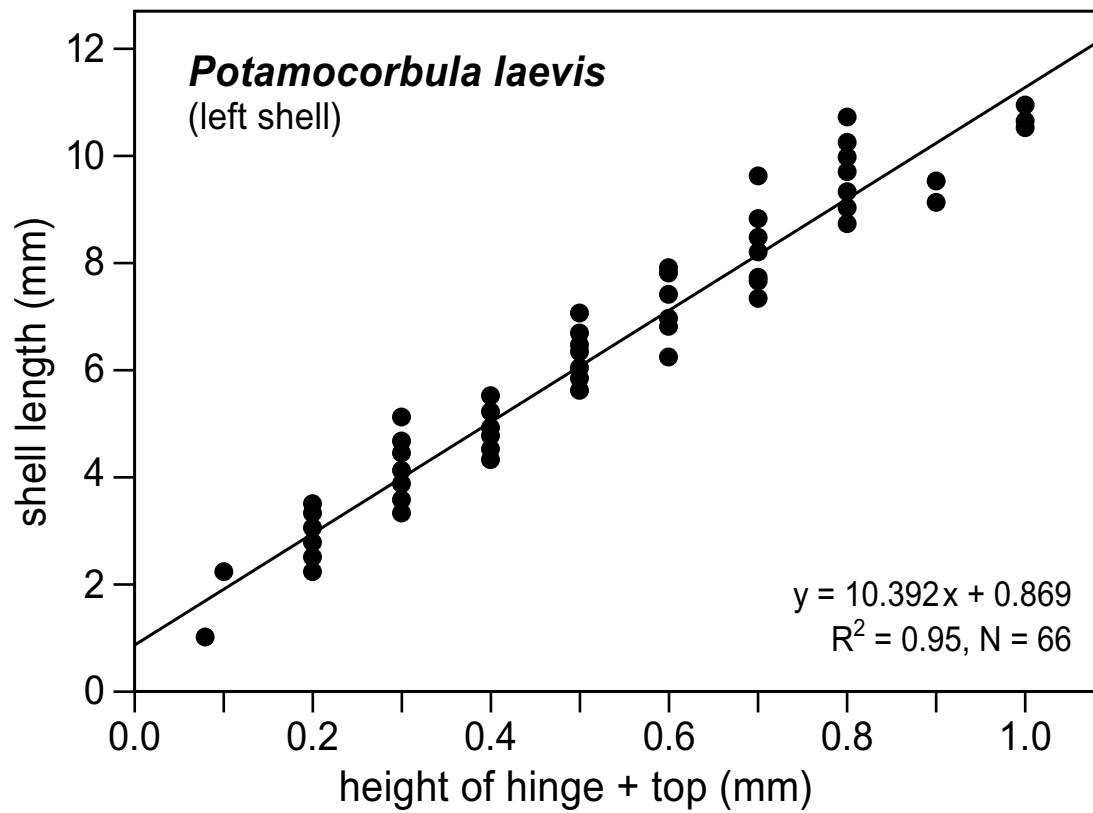

**Fig. S1.** Estimating shell length from the height of hinge and top for the main food of red knots in Bohai Bay: *Potamocorbula laevis*. The shapes of the two valves of *P. laevis* are different, and as a result the relationships between height of hinge and top and shell length differ within one bivalve. We thus only measured left shells.
